# Supplementary material for: Contamination and Probabilistic Ecological–Health Risk of Heavy Metal(loid)s in Urban Topsoil of Mianyang, SW China
Source: MDPI journal article supplement (doi:10.3390/ijerph192215126), 2022-11-16
Supplement: s1 [file s1]

*Supplementary Materials*

# **Contamination and Probabilistic Ecological-Health Risk of Heavy Metal(Loid)S in Urban Topsoil of Mianyang, SW China**

**Huaming Du <sup>1,2</sup> and Xinwei Lu <sup>2,\*</sup>**

<sup>1</sup> School of Resource and Environment Engineering, Mianyang Normal University, Mianyang 621000, China

<sup>2</sup> Department of Environmental Science, School of Geography and Tourism, Shaanxi Normal University, Xi'an 710119, China

\* Correspondence: luxinwei@snnu.edu.cn

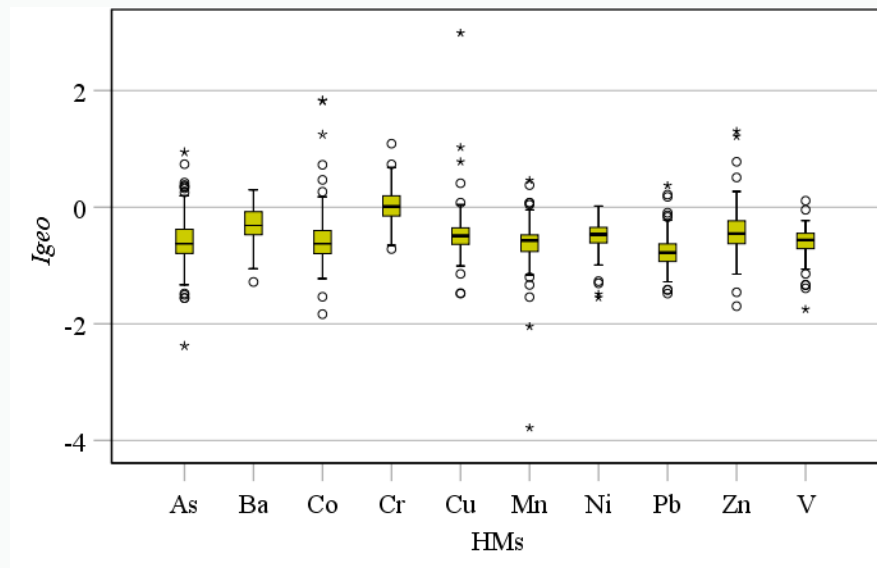

**Figure S1.** Box-plots of  $I_{geo}$  for HMs in Mianyang urban topsoil samples.

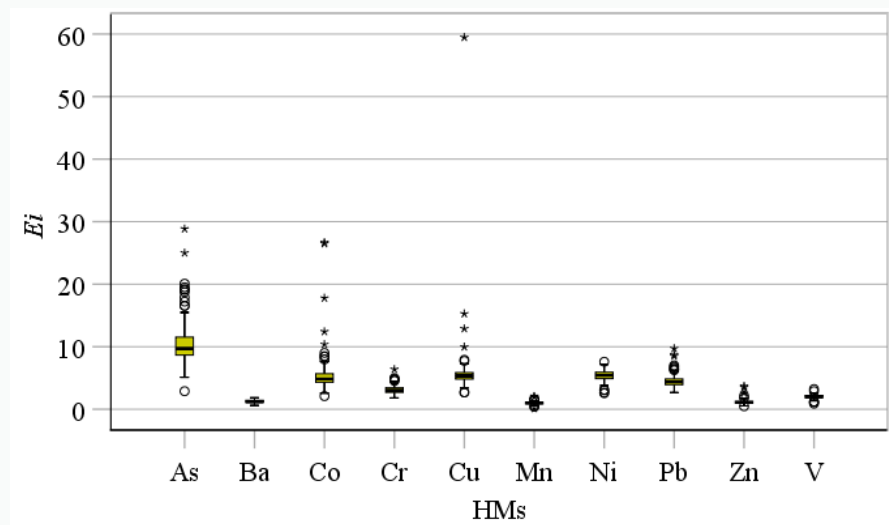

**Figure S2.** Box-plots of  $E_i$  for HMs in Mianyang urban topsoil samples.

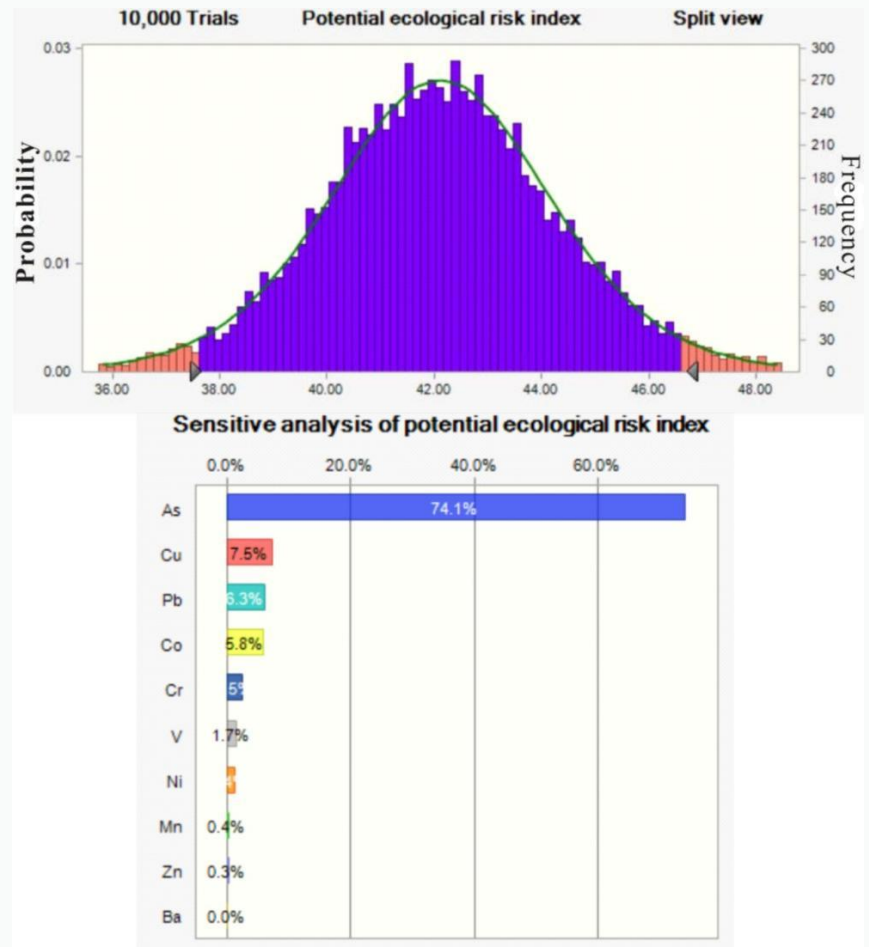

**Figure S3.** Probability distribution and sensitivity analysis of potential ecological risk index (RI).

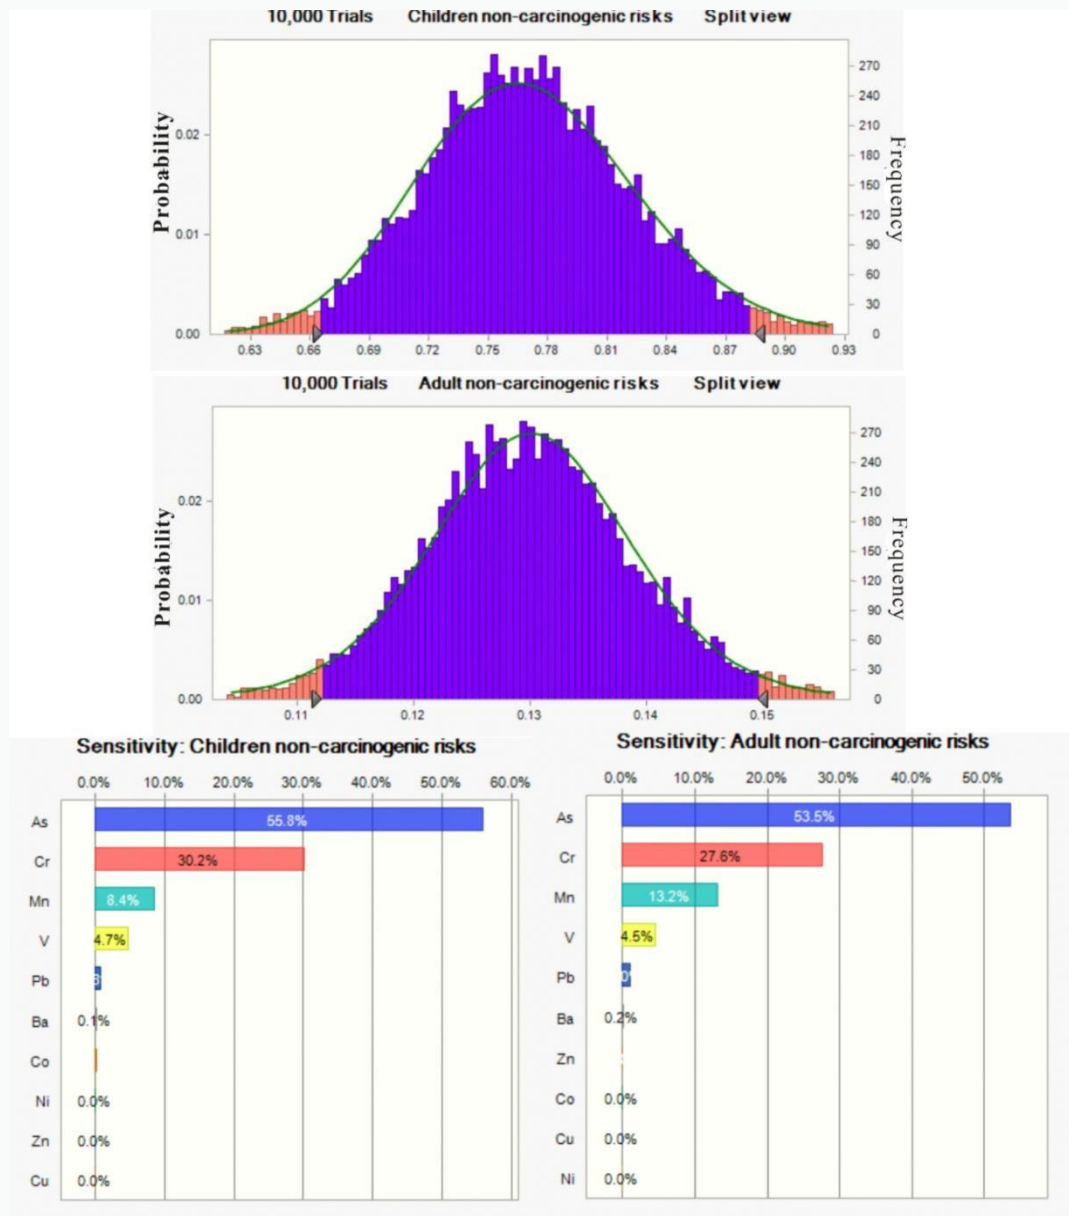

**Figure S4.** Probability distribution and sensitivity analysis of HM non-carcinogenic risk.

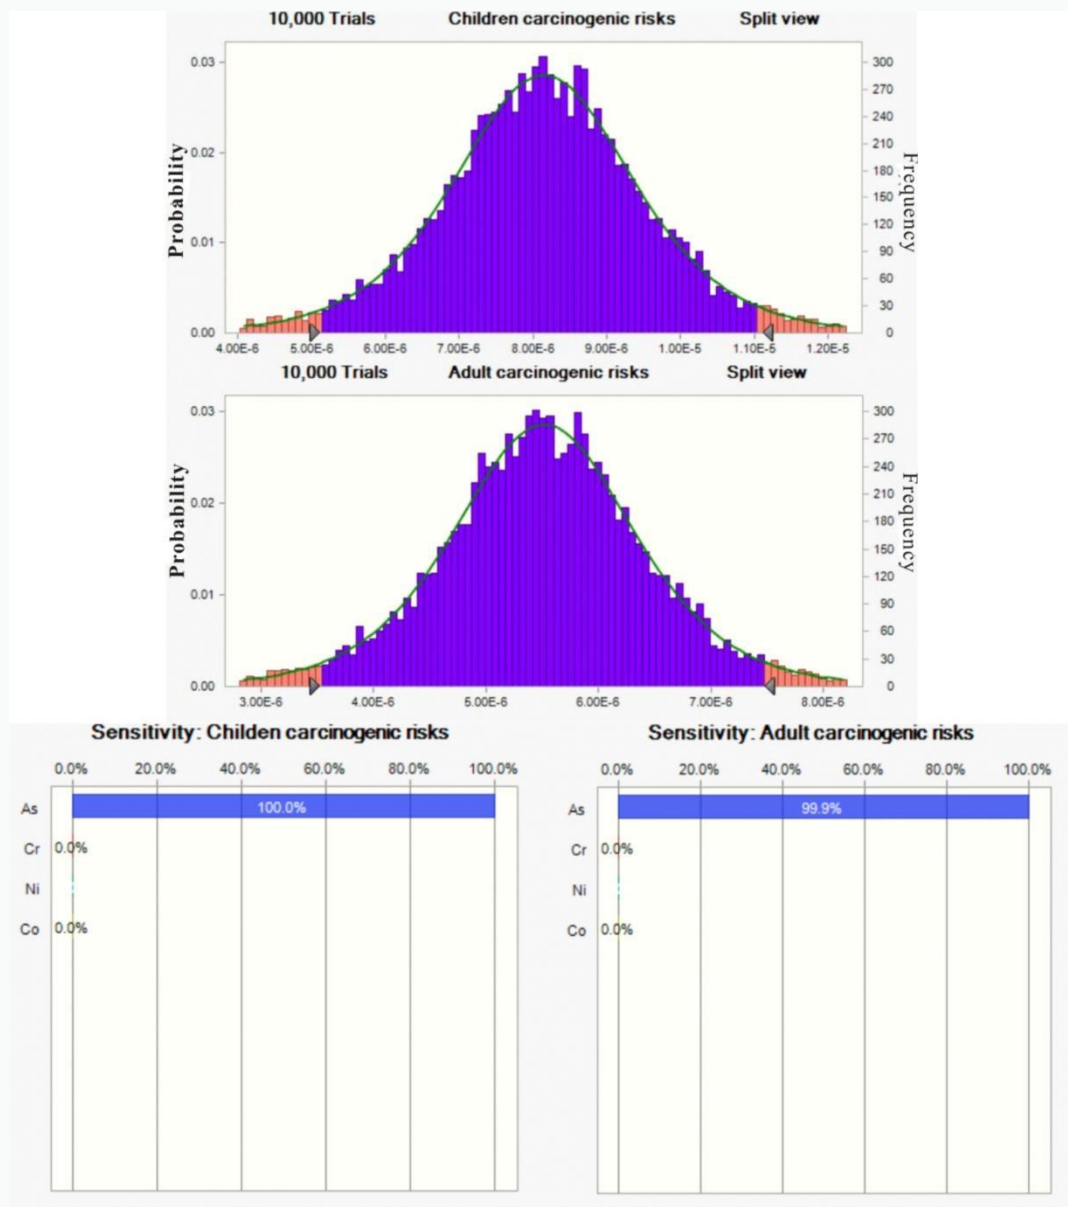

**Figure S5.** Probability distribution and sensitivity analysis of HM carcinogenic risk.

**Table S1.** Pollution degree and  $I_{geo}$  value.

| $I_{geo}$ | Grade | Pollution degree                          |
|-----------|-------|-------------------------------------------|
| $\leq 0$  | 0     | Uncontaminated                            |
| 0-1       | 1     | Uncontaminated to moderately contaminated |
| 1-2       | 2     | Moderately contaminated                   |
| 2-3       | 3     | Moderately to heavily contaminated        |
| 3-4       | 4     | Heavily contaminated                      |
| 4-5       | 5     | Heavily to extremely contaminated         |
| $\geq 5$  | 6     | Extremely contaminated                    |

**Table S2.** Grade of potential ecological risk index.

| $E_i$      | $RI$       | Ecological risk degree |
|------------|------------|------------------------|
| <15        | <50        | Low                    |
| 15-30      | 50-100     | Moderate               |
| 30-60      | 100-200    | Considerable           |
| 60-120     | $\geq 200$ | High                   |
| $\geq 120$ |            | Very high              |

**Table S3.** Parameter value of exposure assessment model.

| Parameter           | Meaning                  | Unit                                     | Child                | Adult                | Literature |
|---------------------|--------------------------|------------------------------------------|----------------------|----------------------|------------|
| C                   | Concentration of HMs     | mg kg <sup>-1</sup>                      | 95%<br>UCL           | 95%<br>UCL           | This work  |
| ED                  | Exposure duration        | year                                     | 6                    | 24                   | [37]       |
| BW                  | Average body weight      | kg                                       | 19.2                 | 61.8                 | [39]       |
| EF                  | Exposure frequency       | day year <sup>-1</sup>                   | 180                  | 180                  | [37]       |
| AT(non-carcinogens) | Average time             | day                                      | 365×ED               | 365×ED               | [40]       |
| AT(carcinogens)     | Average time             | day                                      | 365×75               | 365×75               | [40,41]    |
| IngR                | Ingestion rate           | mg day <sup>-1</sup>                     | 200                  | 100                  | [37]       |
| InhR                | Inhalation rate          | m <sup>3</sup> day <sup>-1</sup>         | 7.6                  | 20                   | [38]       |
| PEF                 | Particle emission factor | m <sup>3</sup> kg <sup>-1</sup>          | 1.36×10 <sup>9</sup> | 1.36×10 <sup>9</sup> | [37]       |
| SL                  | Skin adherence factor    | mg cm <sup>-2</sup><br>day <sup>-1</sup> | 0.2                  | 0.07                 | [37]       |
| SA                  | Exposed skin area        | cm                                       | 2848                 | 5374                 | [39]       |
| ABS                 | Dermal absorption factor |                                          | 0.001 (0.03 for As)  |                      | [37]       |

**Table S4.** Parameter value of exposure assessment models.

| Element               | As       | Ba       | Cr       | Co       | Cu       | Ni       | Pb       | Mn       | Zn       | V        |
|-----------------------|----------|----------|----------|----------|----------|----------|----------|----------|----------|----------|
| RfD <sub>ing</sub>    | 3.00E-04 | 7.00E-02 | 3.00E-03 | 2.00E-02 | 4.00E-02 | 2.00E-02 | 3.50E-03 | 4.60E-02 | 3.00E-01 | 7.00E-03 |
| RfD <sub>inh</sub>    | 3.01E-04 | 1.43E-04 | 2.86E-05 | 5.71E-06 | 4.02E-02 | 2.06E-02 | 2.52E-03 | 1.43E-05 | 3.00E-01 | 7.00E-03 |
| RfD <sub>dermal</sub> | 1.23E-04 | 4.90E-03 | 6.00E-05 | 1.60E-02 | 1.20E-02 | 5.40E-03 | 5.25E-04 | 1.84E-03 | 6.00E-02 | 7.00E-05 |
| CSF <sub>ing</sub>    | 1.50E+00 |          |          |          |          |          |          |          |          |          |
| CSF <sub>inh</sub>    | 1.51E+01 |          | 4.20E+01 | 9.8E+00  |          | 8.40E-01 |          |          |          |          |
| CSF <sub>dermal</sub> | 3.66E+00 |          |          |          |          |          |          |          |          |          |

**Table S5.** Distribution test and fitting results of HM contents.

| HMs | Mean   | Median | Standard deviation | Minimum | Maximum | Distribution |
|-----|--------|--------|--------------------|---------|---------|--------------|
| As  | 11.18  | 10.1   | 4.20               | 3       | 30      | Logistic     |
| Ba  | 586.84 | 572.5  | 110.90             | 292.6   | 873.4   | Weibull      |
| Cr  | 124.65 | 119.3  | 28.90              | 72      | 252     | Max Extreme  |
| Co  | 20.15  | 17.1   | 12.50              | 7.4     | 93.9    | Lognormal    |
| Cu  | 37.81  | 33.2   | 34.60              | 16.7    | 369.9   | Lognormal    |
| Ni  | 34.90  | 35.4   | 5.70               | 16.7    | 49.6    | Weibull      |
| Pb  | 28.41  | 27     | 7.10               | 16.6    | 60      | Max Extreme  |
| Mn  | 661.45 | 663.3  | 168.60             | 71.6    | 1356.9  | Logistic     |
| Zn  | 102.21 | 87.4   | 39.00              | 40      | 320.2   | Lognormal    |
| V   | 96.58  | 97.4   | 15.80              | 42.8    | 155.5   | Student's t  |

**Table S6.** The mean value of the simulation results and the mean value of the deterministic calculation results of the non-carcinogenic/carcinogenic risk of HMs.

|       | The stochastic simulation results |                   | The deterministic calculation results |                   |
|-------|-----------------------------------|-------------------|---------------------------------------|-------------------|
|       | non-carcinogenic risk             | carcinogenic risk | non-carcinogenic risk                 | carcinogenic risk |
| Child | 7.70E-01                          | 8.17E-06          | 7.49E-01                              | 8.15E-06          |
| Adult | 1.30E-01                          | 5.53E-06          | 1.27E-01                              | 5.51E-06          |
